# Supplementary material
Source: Research Square preprint supplement (doi:10.21203/rs.3.rs-9215711/v1)
Supplement: Supplementary file 1 [file 45fa275c3058a02b51049cf5.docx]

Appendix 1 – Supplemental Tables

Table S1 PERMANOVA results. Model specification and variable names are described in Tables S3,S5.

|  | Df | Sums of squares | R2 | F statistic | P-Value* |
| --- | --- | --- | --- | --- | --- |
| a) dissimilarity ~ treatment | | | | | |
| treatment | 4 | 16.221 | 0.0567 | 2.178 | <0.001*** |
| residual | 145 | 269.925 | 0.943 | - | - |
| Total | 149 | 289.147 | 1 | - | - |
| b) dissimilarity ~ social + sex | | | | | |
| social | 1 | 2.229 | 0.00779 | 1.198 | 0.401 |
| sex | 2 | 10.927 | 0.0382 | 2.935 | <0.001*** |
| residual | 146 | 271.771 | 0.950 | - | - |
| Total | 149 | 286.147 | 1 | - | - |

* Significance codes: ‘***’ <0.001; ‘**’ = 0.01; ‘*’= 0.05; ‘ ’ = 1

Table S2 PERMANOVA pairwise comparison results, comparing vocalisation functional trait dissimilarity across treatments. Model specification and variable names are described in Tables S3,S5.

|  | df | SS | R2 | F | P |  | df | SS | R2 | F | P |
| --- | --- | --- | --- | --- | --- | --- | --- | --- | --- | --- | --- |
| a) MF_vs_F | | | | | | **b) MF_vs_MM** | | | | | |
| treatment | 1 | 3.802 | 0.033 | 2.152 | 0.010 | treatment | 1 | 4.198 | 0.025 | 2.043 | 0.026 |
| residual | 64 | 113.1 | 0.967 | - | - | residual | 81 | 166.4 | 0.975 | - | - |
| total | 65 | 116.9 | 1 | - | - | total | 82 | 170.6 | 1 | - | - |
| c) MF_vs_M | | | | | | **d) MF_vs_FF** | | | | | |
| treatment | 1 | 3.581 | 0.033 | 1.801 | 0.037 | treatment | 1 | 2.664 | 0.026 | 1.543 | 0.088 |
| residual | 53 | 105.4 | 0.967 | - | - | residual | 58 | 100.1 | 0.974 | - | - |
| total | 54 | 109.0 | 1 | - | - | total | 59 | 102.8 | 1 | - | - |
| e) F_vs_MM | | | | | | **f) F_vs_M** | | | | | |
| treatment | 1 | 7.907 | 0.055 | 4.124 | <0.001 | treatment | 1 | 4.79 | 0.060 | 2.746 | <0.001 |
| residual | 71 | 136.1 | 0.945 | - | - | residual | 43 | 75.07 | 0.940 | - | - |
| total | 72 | 144.0 | 1 | - | - | total | 44 | 79.86 | 1 | - | - |
| g) F_vs_FF | | | | | | **h) MM_vs_M** | | | | | |
| treatment | 1 | 2.703 | 0.037 | 1.858 | 0.021 | treatment | 1 | 1.372 | 0.011 | 0.641 | 0.824 |
| residual | 48 | 69.82 | 0.963 | - | - | residual | 60 | 128.4 | 0.989 | - | - |
| total | 49 | 72.53 | 1 | - | - | total | 61 | 129.8 | 1 | - | - |
| i) MM_vs_FF | | | | | | **j) M_vs_FF** | | | | | |
| treatment | 1 | 4.917 | 0.038 | 2.595 | 0.007 | treatment | 1 | 3.444 | 0.053 | 2.052 | 0.017 |
| residual | 65 | 123.2 | 0.962 | - | - | residual | 37 | 62.10 | 0.947 | - | - |
| total | 66 | 128.1 | 1 | - | - | total | 38 | 65.55 | 1 | - | - |

**Table S3** Analysis of Variance Table showing results from an analysis of multivariate homogeneity of group dispersions. We tested whether distances from group centres (variances) were different among (a) sex treatments (male, female, mix), (b) social treatments (together or solo) and (c) treatments (M, MM, MF, F, FF).

|  | DF | Sums of Square | Mean Square | F value | P value |
| --- | --- | --- | --- | --- | --- |
| a) sex |  |  |  |  |  |
| Groups | 2 | 22.503 | 11.252 | 5.797 | **0.00377** |
| Residuals | 147 | 285.307 | 1.941 |  |  |
| b) social |  |  |  |  |  |
| Groups | 1 | 1.741 | 1.741 | 0.796 | 0.374 |
| Residuals | 148 | 323.600 | 2.186 |  |  |
| c) treatment |  |  |  |  |  |
| Groups | 4 | 25.669 | 6.417 | 3.280 | **0.0132** |
| Residuals | 145 | 283.728 | 1.957 |  |  |

**Table S4** Table showing results from a tukey test inspecting which treatment groups differing group dispersions. We tested differences among (a) sex treatments (male, female, mix), (b) social treatments (together or solo) and (c) treatments (M, MM, MF, F, FF).

| Comparisons | difference | Lower 95% CI | Upper 95% CI | Adjusted  P value |
| --- | --- | --- | --- | --- |
| a) sex |  |  |  |  |
| male-female | 0.225 | 0.0854 | 0.366 | **0.00313** |
| mix-female | 0.166 | 0.00715 | 0.324 | 0.0813 |
| mix-male | -0.0598 | -0.212 | 0.092 | 0.695 |
| b) social |  |  |  |  |
| together-solo | 0.0596 | -0.0524 | 0.172 | 0.380 |
| c) treatment |  |  |  |  |
| FF-F | -0.0776 | -0.333 | 0.178 | 0.943 |
| M-F | 0.176 | -0.100 | 0.451 | 0.512 |
| MF-F | 0.145 | -0.0784 | 0.368 | 0.492 |
| MM-F | 0.212 | -0.0042 | 0.428 | 0.112 |
| M-FF | 0.253 | -0.0365 | 0.543 | 0.197 |
| MF-FF | 0.223 | -0.0177 | 0.463 | 0.151 |
| MM-FF | 0.289 | 0.0559 | 0.523 | **0.0206** |
| MF-M | -0.0305 | -0.292 | 0.231 | 0.998 |
| MM-M | 0.0361 | -0.219 | 0.291 | 0.997 |
| MM-MF | 0.0667 | -0.131 | 0.264 | 0.918 |

Table S5 PERMANOVA pairwise comparison results, comparing vocalisation functional trait dissimilarity across sex treatments. Model specification and variable names are described in Tables S3,S5.

|  | df | SS | R2 | F | P |  | df | SS | R2 | F | P |
| --- | --- | --- | --- | --- | --- | --- | --- | --- | --- | --- | --- |
| a) mix_vs_female | | | | | | **b) mix_vs_male** | | | | | |
| sex | 1 | 2.664 | 0.018 | 1.600 | 0.0671 | sex | 1 | 4.198 | 0.020 | 2.035 | 0.021 |
| social | 1 | 2.703 | 0.018 | 1.623 | 0.0622 | social | 1 | 1.372 | 0.007 | 0.665 | 0.817 |
| residual | 85 | 141.5 | 0.958 | - | - | residual | 97 | 200.1 | 0.969 | - | - |
| total | 87 | 147.7 | 1 | - | - | total | 99 | 206.4 | 1 | - | - |
| c) female_vs_male | | | | | |  | | | | | |
| sex | 1 | 7.87 | 0.037 | 4.285 | <0.001 |  |  |  |  |  |  |
| social | 1 | 2.229 | 0.011 | 1.214 | 0.235 |  |  |  |  |  |  |
| residual | 109 | 200.1 | 0.946 | - | - |  |  |  |  |  |  |
| total | 111 | 211.4 | 1 | - | - |  |  |  |  |  |  |

Table S6 Poisson model results investigating whether vocalisation abundance and sex treatment predict the number of interactions observed. Variable names are described in Table S5.

|  | estimate | SE | Z | P* |
| --- | --- | --- | --- | --- |
|  |  |  |  |  |
| intercept | 2.259 | 0.135 | 16.688 | <0.001*** |
| sex (male) | 0.347 | 0.172 | 2.171 | 0.0437* |
| sex (mix) | 0.257 | 0.171 | 1.504 | 0.1327 |
| vocal abundance | -0.0304 | 0.0145 | -2.095 | 0.0361* |

* Significance codes: ‘***’ <0.001; ‘**’ = 0.01; ‘*’= 0.05; ‘ ’ = 1

Table S7 Poisson model pairwise comparisons investigating differences in social interactions among sex treatments. Variable names are described in Table S5.

| Contrast | estimate | SE | Z | P* |
| --- | --- | --- | --- | --- |
| female - male | -3.47 | 1.72 | -2.018 | 0.108 |
| female - mix | -2.45 | 1.63 | -1.507 | 0.288 |
| male - mix | 1.02 | 1.82 | 0.559 | 0.842 |

* Significance codes: ‘***’ <0.001; ‘**’ = 0.01; ‘*’= 0.05; ‘ ’ = 1

Table S8 Final acoustic parameters used in cluster model and associated reasoning, including minimum frequency (min freq), maximum frequency (max freq), the maximum intersyllable gap (max intersyllable gap), the minimum duration (min duration), the maximum duration (max duration), the fast Fourier transform window (FFT window), and maximum distance to the cluster centre (max dist to cluster). Parameters were chosen based on previous literature on turtle vocalizations, and subsequently modified to fit the dataset.

| Parameter | Value | Reasoning |
| --- | --- | --- |
| Min freq | 1500 Hz | There were numerous non-target sounds at sound frequencies below 1500Hz (e.g., anthropogenic noise), and the average dominant frequency of vocalizations generally ranges above this minimum frequency. |
| Max freq | 10000 Hz | Non-target sounds are found above 10000 Hz (e.g., distorted noise, birds) and the average dominant frequency of a turtle calls range below this maximum frequency. |
| Max intersyllable gap | 0.15s | This value is conservative as it limits the number of non-target movement sounds from being included, and syllable gaps between turtle vocalisations generally do not extend this range. |
| Min duration | 0s | The minimum duration of a single pulse (syllable) of a turtle vocalization can range below 0.001 seconds. |
| Max duration | 0.3s | On average, the maximum duration of a single turtle vocalization pulse/syllable can range to a maximum of 0.3 seconds. |
| FFT window | 1042ms | The FFT window optimizes the temporal and frequency resolutions of each vocalization. For vocalization types 3-6, higher temporal resolution (low FFT) is necessary to discriminate each broadband pulse. For vocalization types 1-2, higher frequency resolution (high FFT) is necessary to discriminate each harmonic band. A 1042 ms FFT window was optimal to discriminate pulses and harmonic bands of each vocalization detected, as higher FFT settings resulted in poor discrimination between vocalizations with broadband pulses and broadband movement sounds. |
| Max dist to cluster | 2 | Max distance to cluster ensures that all audio detections are included in the output, irrespective of their similarity to the cluster centre. |

Table S9 Criteria used to manually label and extract painted turtle vocalizations

|  | Criteria | Reason |
| --- | --- | --- |
| 1 | Length of vocalization | Past publications have found that most turtle vocalizations are not prolonged and last anywhere from 0.001s to 3 seconds. |
| 2 | Symmetry of spectrogram | Many vocalizations exhibit a symmetrical structure when recorded on a spectrogram, indicating a noise of biological origin |
| 3 | Simplicity of vocalization | Short nonhuman vocalizations, classified as “calls”, are usually short and simple. These types of calls are widespread in the animal kingdom and often serve a purpose (alarm, greeting, |
| 4 | Comparison to mechanical test extractions | It was found that many audio extractions from the mechanical test imitated the spectral characteristics of vocalizations. Those that matched the mechanical test spectrograms were removed from analysis. |
| 5 | Frequency range | While the full hearing range of C. picta is unknown, non-target anthropogenic noise is often under 1500Hz, while non-target biological noise (humans, birds) can range above 10,000Hz |
| 6 | Similarity to other papers | A visual spectrogram comparison to other papers was employed |
| 7 | Presence of harmonics | Harmonics in turtle vocalizations are produced by a vibration of the vocal apparatus 1, which relies on the vibration of either a hyoid apparatus or an apparatus with a function analogous to “vocal chords” 2. Harmonics are common in underwater communication and rely on low-frequency vibration to propagate. |

1 Jorgewich-Cohen et al. 2024. Integrative Organismal Biology. https://doi.org/10.1093/iob/obae014

2 Russell & Bauer. 2020. The Anatomical Record. https://doi.org/10.1002/ar.24553

Table S10 PERMANOVA model specifications investigating dissimilarity in acoustic functional traits with respect to treatment (a), social context and sex treatment (b). Linear model specification investigating variance-covariance of acoustic traits (value) between treatments and individual vocalisations (units) (c). Poisson hurdle model specifications investigating whether vocalisation abundance and sex treatment predict the probability of interacting or the number of interactions observed (d, e). Variable names are described in Table S5.

| model | response | predictor | random effects* | family |
| --- | --- | --- | --- | --- |
| a) | dissimilarity | treatment | trial_id | PERMANOVA |
| b) | dissimilarity | social + sex | trial_id | PERMANOVA |
| c) | value | trait:(treatment) - 1 | (trait-1|trial_id) + (trait-1|units) | Gaussian |
| d) | interactions | sex * vocal_abundance | - | poisson (log link) |
| e) | interactions | sex + vocal_abundance | - | poisson (log link) |

** random effects for PERMANOVAs represent stratified blocks.*

Table S11 Levels of all categorical variables (treatment, social, sex) used in statistical models and associated descriptions.

| Treatment | Social | Sex | Description |
| --- | --- | --- | --- |
| M | Solo | Male | 1 male |
| MM | Together | Male | 2 males |
| F | Solo | Female | 1 female |
| FF | Together | Female | 2 females |
| MF | Together | Mix | 1 male and 1 female |

Table S12

| Variable Name | Variable Type | Description |
| --- | --- | --- |
| value | continuous | Centered and scaled values of each acoustic trait. |
| trait | categorical | Name for each acoustic trait that was measured including dominant frequency (kHz), maximum frequency (kHz), minimum frequency (kHz), the number of harmonic bands, pulse number, mean pulse length (s), mean pulse length interval (s) and total duration (s). |
| units | discrete | Unique identifier for each vocalization. |
| treatment | categorical | Experimental treatments with 5 levels (M = 1 male, MM = 2 males, MF = 1 male and 1 female, FF = 2 females, F = female) |
| trial_ID | discrete | A unique identifier for each combination of trial (7 total) and treatment (5 total). |
| dissimilarity | matrix | Euclidean dissimilarity index from centered and scaled vocalization traits (dominant frequency, maximum frequency, minimum frequency, the presence of harmonic bands, pulse number, mean pulse length, mean pulse length interval and total duration). |
| social | categorical | Experimental treatments grouped into 2 levels based on the number of turtles in a treatment (solo = F and M, together = FF, MM and MF) |
| sex | categorical | Experimental treatments grouped into 3 levels based on the turtle’s sex (female = F and FF, male = M and MM, mix = MF ) |
| vocal abundance | integer/continuous | The total number of vocalizations recorded for each 1-hour trial of each treatment. |
| interactions | integer/continuous | number of times turtles were in the same subsection of the experimental tank as their conspecific. Number of interactions were modelled for the presence of sociality (0,1) and the magnitude of social interactions (>1). |

Appendix 2 – Supplemental Figures


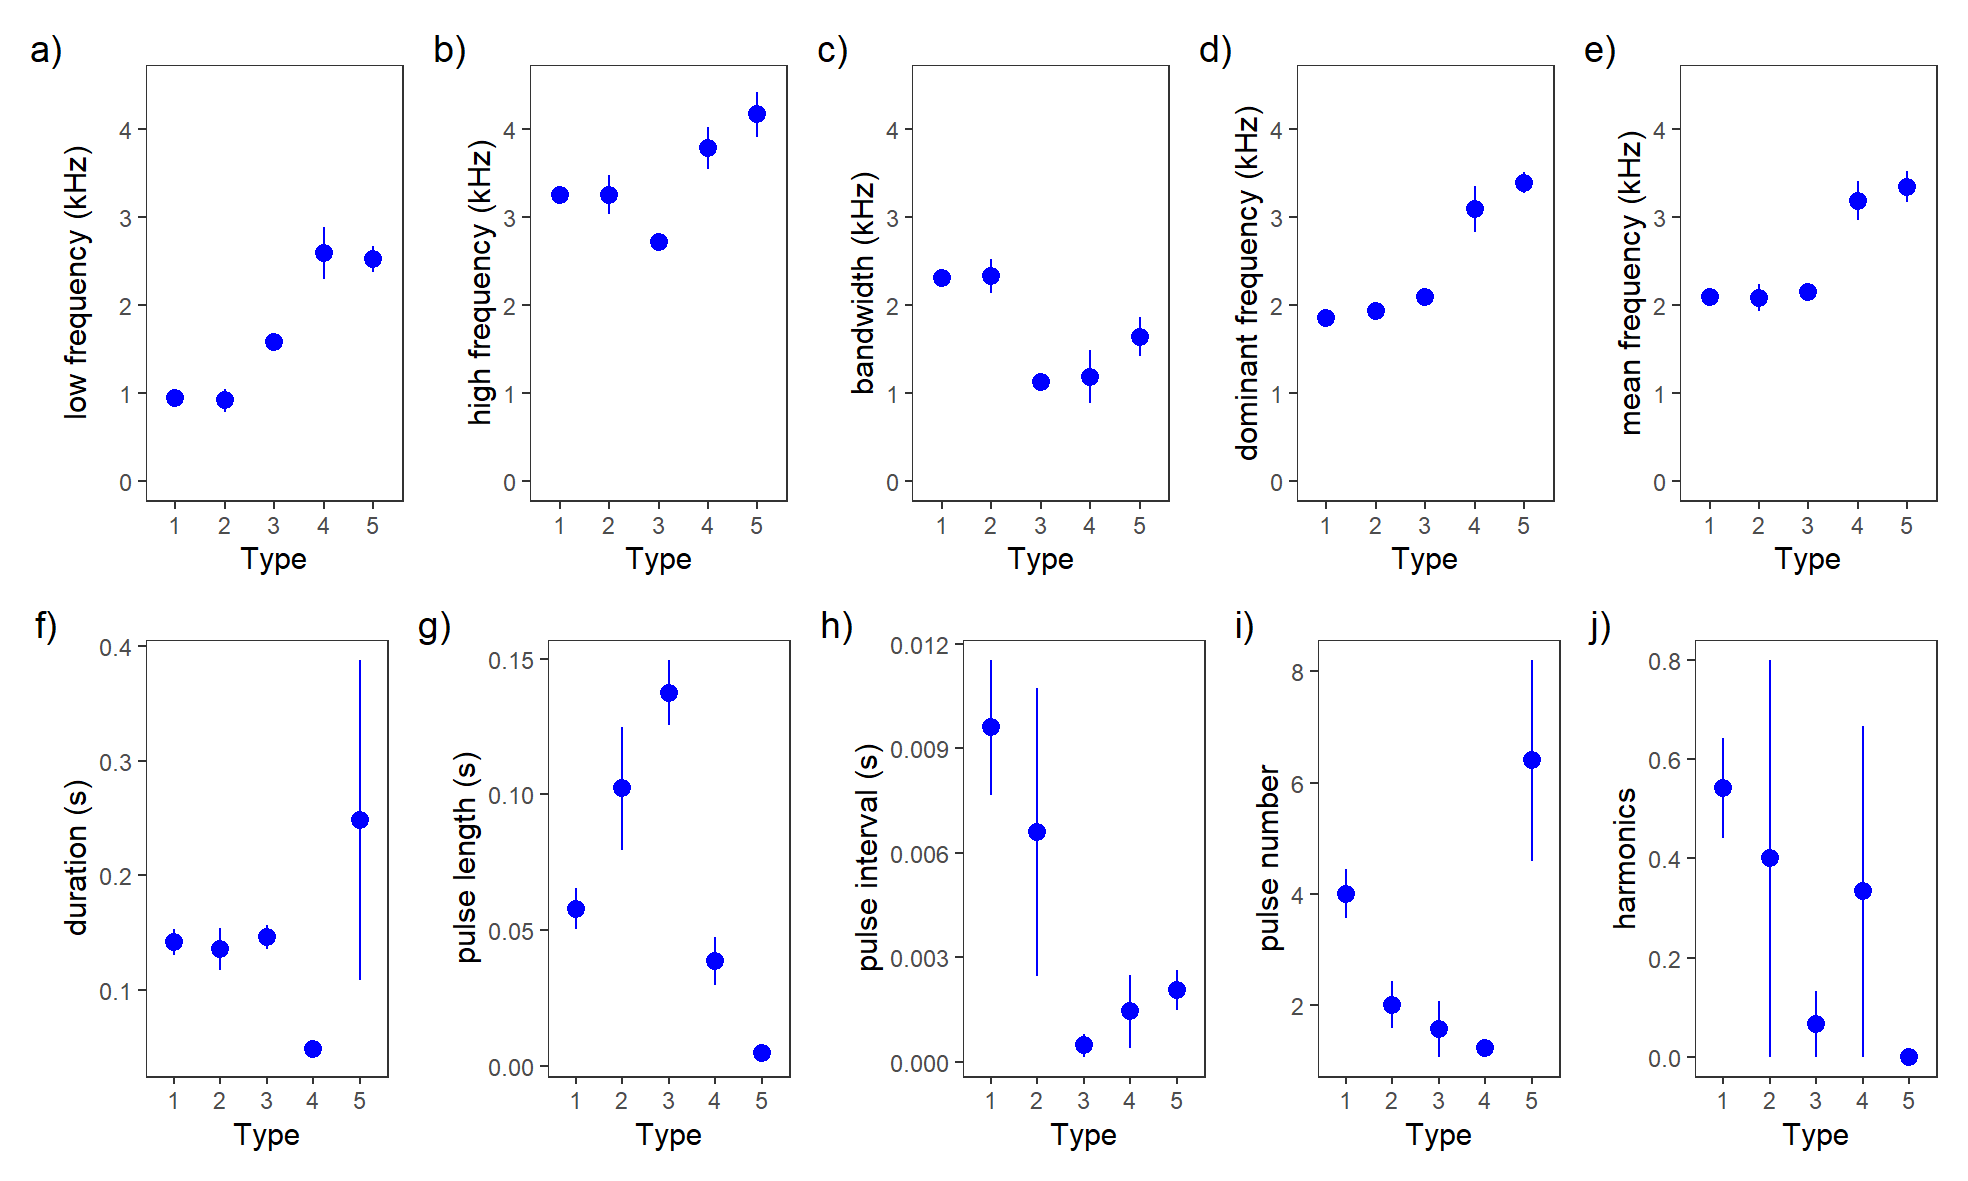


**Figure S1** Mean a) minimum frequency, b) maximum frequency, c) bandwidth, d) dominant frequency, e) mean frequency, f) duration, g) pulse length, h) pulse interval length, i) number of pulses, and j) harmonics, with respect to each vocalization type. Error bars show standard errors.


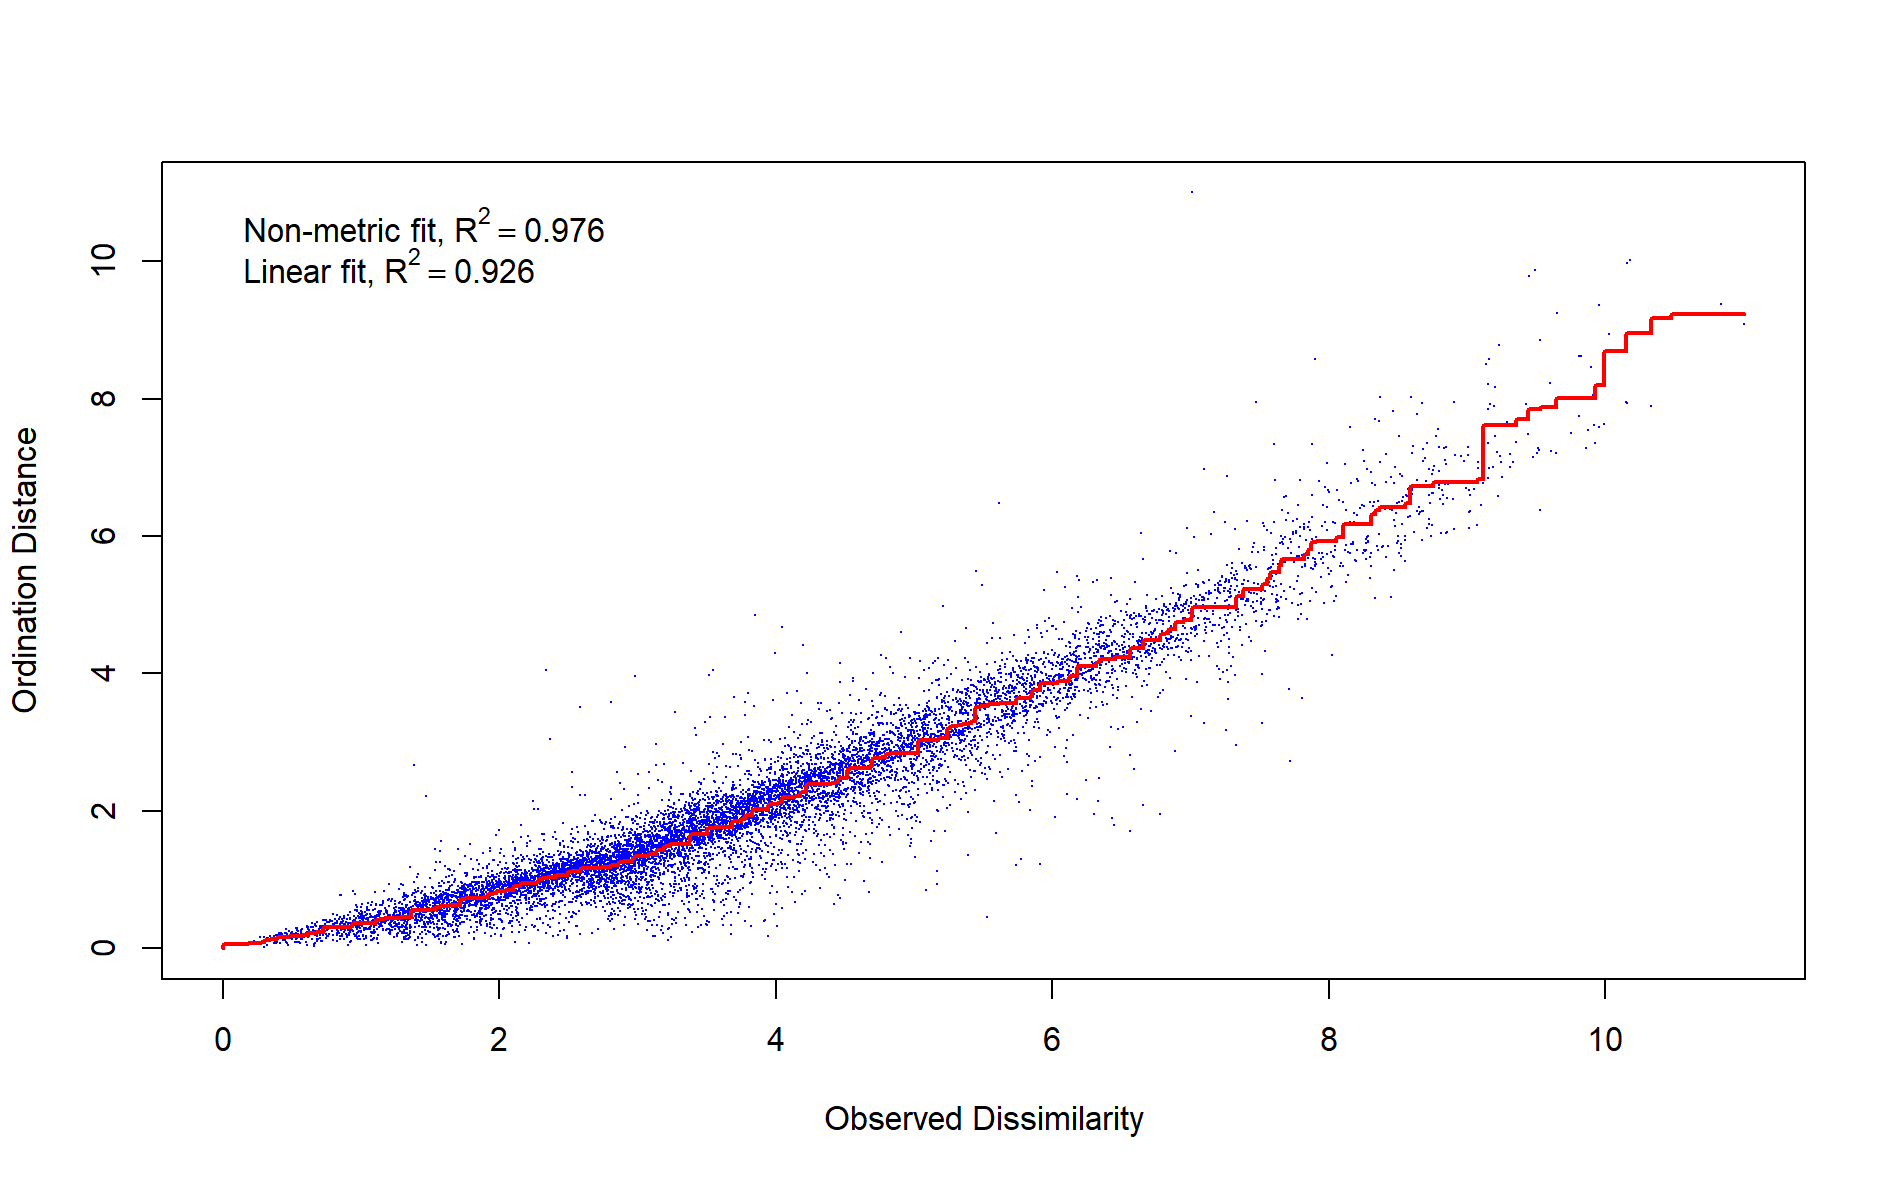


**Figure S2** Regression curve showing ordination distance with respect to observed dissimilarity among acoustic functional traits.
